1 **Structural heterogeneity of cellular K5/K14 filaments as revealed by cryo-**  
2 **electron microscopy**

3

4 Short title: Structural heterogeneity of keratin filaments

5

6

7 Miriam S. Weber<sup>1</sup>, Matthias Eibauer<sup>1</sup>, Suganya Sivagurunathan<sup>2</sup>, Thomas M. Magin<sup>3</sup>, Robert D.  
8 Goldman<sup>2</sup>, Ohad Medalia<sup>1\*</sup>

9 <sup>1</sup>Department of Biochemistry, University of Zurich, Switzerland

10 <sup>2</sup>Department of Cell and Developmental Biology, Northwestern University Feinberg School of  
11 Medicine, USA

12 <sup>3</sup>Institute of Biology, University of Leipzig, Germany

13

14 \* Corresponding author: omedalia@bioc.uzh.ch

15

16

## 17 Abstract

18 Keratin intermediate filaments are an essential and major component of the cytoskeleton in epithelial  
19 cells. They form a stable yet dynamic filamentous network extending from the nucleus to the cell  
20 periphery. Keratin filaments provide cellular resistance to mechanical stresses, ensure cell and tissue  
21 integrity in addition to regulatory functions. Mutations in keratin genes are related to a variety of  
22 epithelial tissue diseases that mostly affect skin and hair. Despite their importance, the molecular  
23 structure of keratin filaments remains largely unknown. In this study, we analyzed the structure of  
24 keratin 5/keratin 14 filaments within ghost keratinocytes by cryo-electron microscopy and cryo-  
25 electron tomography. By averaging a large number of keratin segments, we have gained insights into  
26 the helical architecture of the filaments. Interestingly, two-dimensional classification revealed  
27 profound variations in the diameter of keratin filaments and their subunit organization. Reconstitution  
28 of filaments of substantial length from keratin segments uncovered a high degree of internal  
29 heterogeneity along single filaments, which can contain regions of helical symmetry, regions with less  
30 symmetry and regions with significant diameter fluctuations. Cross section views of filaments revealed  
31 that keratins form hollow cylinders consisting of multiple protofilaments, with an electron dense core  
32 located in the center of the filament. These findings shed light on the complex architecture of keratin  
33 filaments, which demonstrate a remarkable degree of heterogeneity, suggesting that they are highly  
34 flexible, dynamic cytoskeletal structures.

35

36 **Keywords:** keratins, intermediate filaments, CRISPR knockout, cryo-electron microscopy, cryo-electron  
37 tomography

38

39

## 40 Introduction

41 Keratin Intermediate Filaments (KIFs) are an essential component of the cytoskeleton of epithelial  
42 cells. KIFs are classified as type I and type II Intermediate Filament (IF) proteins, according to their  
43 sequence (1-3). Keratins form a highly flexible and dynamic filamentous network in the cytoplasm (4-  
44 9). Their main known function is to protect the cell from external stresses by providing mechanical  
45 stability and ensuring the integrity of tissues through cell-cell and cell-matrix contacts. Point mutations  
46 in keratin genes are associated with cell and tissue instabilities and severe diseases, termed  
47 keratinopathies (3, 10). For example, the skin blistering disease Epidermolysis Bullosa Simplex (EBS) is  
48 caused by point mutations in the Keratin 5 (K5) and 14 (K14) genes (11-13). A key to understanding the  
49 function of KIFs in both normal and diseased cells is to unveil the structural organization of the  
50 filaments.

51 Keratin proteins are composed of three domains: a highly conserved  $\alpha$ -helical central rod domain,  
52 known to facilitate filament assembly, and intrinsically disordered head and tail domains. The latter  
53 are highly post-translationally modified and are regarded as essential for regulatory functions and  
54 filament stability (14-16). Keratins are obligatory heterodimers, formed by the parallel and in-register  
55 assembly of an acidic type I and a basic type II keratin protein. Two dimers assemble into antiparallel  
56 tetramers, which can further align laterally and longitudinally to build mature keratin filaments (17-  
57 19). Longitudinally elongated tandem arrays of tetrameric subunits are termed protofilaments.

58 Although KIFs have been studied intensely for many years, details of their molecular architecture  
59 remain largely unknown (20). On the level of keratin monomers and dimers, crystallographic studies  
60 have provided high resolution insights into the organization of small regions of the central rod domain  
61 (18, 21-23) and molecular dynamics simulations have provided a 3D model of a complete K1/K10  
62 dimer (24). Four different modes of tetramer assembly have been identified by cross-linking studies,  
63 describing how higher order oligomers form during filament assembly (17). It is expected that filament  
64 assembly starts by the formation of  $A_{11}$  tetramers, where the 1B domains of the rod of two adjacent

65 dimers interact in a half-staggered, antiparallel arrangement (18, 19). Tetramers can elongate  
66 longitudinally by formation of  $A_{22}$  interactions, where the 2B domains of adjacent rods overlap (18,  
67 19). Laterally, neighboring tetramers interact via  $A_{12}$  bindings to form 10 nm wide filaments (18, 19).  
68 However, little is known about the 3D high-resolution structure of mature keratin filaments. It is  
69 generally accepted that keratin filaments are helical assemblies consisting of multiple protofilaments  
70 (25-27), which form a cylindrical tube (15). However, the exact number of protofilaments per filament  
71 and therefore the number of keratin monomers per cross section is still debated and may vary with  
72 respect to the specific type I/type II keratin pairs expressed. Mass-Per-unit-Length (MPL)  
73 measurements of recombinant *in vitro* assembled K8/K18 filaments have suggested that they are built  
74 from 16 – 25 monomeric protein chains in cross section, depending on the ionic strength of the buffer  
75 and the assembly time (28). Interestingly, MPL measurements of KIFs assembled *in vitro* from keratins  
76 extracted from human epidermis have revealed that the majority of them contain 13 – 16 polypeptides  
77 in cross section, with fewer numbers of KIF comprised of either 20 – 26 or 28 – 35 polypeptides (29).  
78 These variations have been attributed to structural polymorphism of KIFs and apparently occur by  
79 varying the number of protofilaments along and among keratin filaments (29). In addition, there are  
80 conflicting views as to whether KIFs are hollow or filled tubes and whether they contain an internal  
81 structure (15, 30-34).

82 Here, we studied the structure of native cellular K5/K14 filaments by Cryo-Electron Microscopy (cryo-  
83 EM) and Cryo-Electron Tomography (cryo-ET) (35). Since the expression of keratin isoforms is variable  
84 and complex in cultured cells, we prepared a cell line expressing filaments composed of K5/K14 only  
85 and studied their architecture within cells that were grown and lysed on EM grids, i.e. ghost cells. This  
86 process avoids potential structural artifacts due to *in vitro* assembly of KIFs. Our cryo-EM analysis  
87 revealed the remarkably heterogenic nature of keratin filaments and uncovered changes in the  
88 diameter and the helical pattern propagating along the filament. Cryo-ET and analysis of filament cross  
89 sections revealed that the K5/K14 filaments are composed of a hollow cylinder with an internal  
90 electron dense core. The wall of the cylinder is constructed of a ring of six protofilaments. Our results

91 quantify the flexibility of keratin filaments and uncover the immense structural heterogeneity of  
92 individual K5/K14 filaments.

## 93 Results

### 94 **Generation of mouse keratinocytes expressing only K5/K14 filaments**

95 Heterogeneity is a challenging problem that hampers structural determination (36). Thus, the  
96 occurrence of multiple keratin pairs in most epithelial cells hinders the structural analysis of keratin  
97 filaments in their native environment, due to intrinsic structural heterogeneity (37). In this study, we  
98 set to gain insights into the architecture of cellular K5/K14 filaments. Therefore, we utilized the murine  
99 keratinocyte cell line *Ktyl<sup>-/-</sup>* K14, which expresses the K5, K6 and K14 proteins as their only keratin  
100 isoforms (38). To reduce the keratin expression to K5 and K14 only, CRISPR/Cas9 was used to knock  
101 out the K6a and the K6b gene, which share 92.6 % sequence identity (Material and Methods section).  
102 Although a small amount of wild-type K6b DNA was retained (Figure 1–figure supplement 1A, B),  
103 immunostaining revealed that no filaments containing K6 assemble in the resulting K5/14\_1 cell line,  
104 and therefore do not affect the structural analysis carried out in our study (Figure 1–figure supplement  
105 1C). We therefore conclude that the keratin filaments in this cell line consist only of K5/K14 protein  
106 pairs. A careful analysis of the KIF network after the CRISPR/Cas9 knockout procedure by confocal  
107 fluorescence microscopy indicated no obvious impact on the K5/K14 filament network (Figure 1A,  
108 Figure 1–figure supplement 1C).

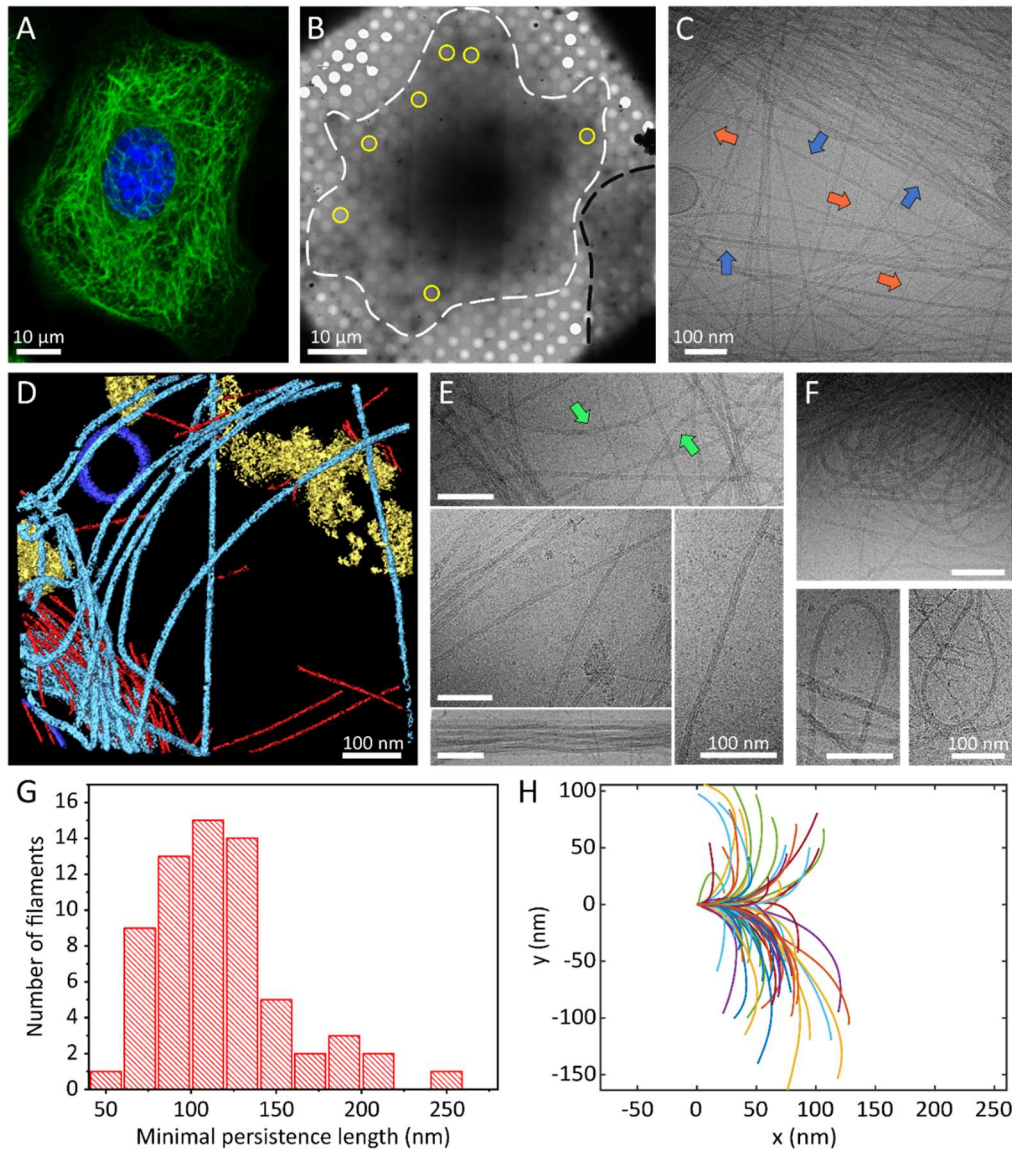

109

110 **Figure 1. Cellular K5/K14 filaments as revealed by light and cryo-electron microscopy.**

111 (A) The murine keratinocyte cell line K5/K14\_1 expressing only K5 and K14 filaments forms a complex KIF meshwork, as  
112 revealed by confocal immunofluorescence. Cells were stained for K14 (green) and chromatin (blue). (B) Ghost cells were  
113 analyzed by cryo-EM and cryo-ET. Low magnification image of a cell grown on an EM-grid and treated with detergent prior  
114 to vitrification. Cell boundaries (dashed white line) are detected as well as a neighboring cell (dashed black line). Typical  
115 regions that were analyzed by cryo-EM are marked (yellow circles). (C) A typical cryo-EM micrograph of a ghost cell imaged  
116 at a higher magnification allows the detection of keratin filaments and other cytoskeletal elements. Keratin filaments (blue  
117 arrows) and actin filaments (orange arrows) are distinguished by their characteristic diameter. A large keratin bundle is visible  
118 in the top right corner. (D) Surface rendering view of a cryo-tomogram of a ghost cell. Keratin filaments (light blue), actin  
119 filaments (red), vesicles (dark blue) and cellular debris (yellow) were manually segmented. (E) Different organizations of  
120 keratin filaments observed in the electron micrographs, including straight filaments (middle), curved (top, green arrows) and

121 bundled filaments (bottom left). Scale bars: 100 nm. (F) Highly bent keratin filaments are found within ghost cells. Scale bars:  
122 100 nm. (G) Quantification of the minimal apparent persistence length measurements performed on 65 highly bent keratin  
123 filaments. (H) A plot combining 65 contours of filaments that were used for the minimal apparent persistence length  
124 measurements in (G). Individual filaments, shown in different colors, are aligned at their origins for visualization purposes.

125

## 126 **Cellular keratin filaments revealed by cryo-electron microscopy**

127 K5/14\_1 cells were cultured on cryo-EM grids and subjected to cytoskeleton extraction buffer that  
128 permeabilizes the cells and removes soluble cytoplasmic components and nuclear structures,  
129 producing IF enriched ghost cells (Material and Methods section) (39-44). The ghost cells were  
130 instantly plunge frozen and imaged by cryo-EM and cryo-ET (Figure 1B-D). Keratin filaments could be  
131 easily identified in cryo-EM micrographs (Figure 1C, blue arrows, Figure 1–figure supplement 1D), while  
132 the 3D organization of the keratins within the ghost cells was revealed by cryo-ET (Figure 1D light blue).  
133 Actin filaments were detected in the sample as well (Figure 1C, orange arrows and D, red, Figure 1–  
134 figure supplement 1D) and used as an internal quality control for structural preservation by the  
135 extraction protocol and for cryo-EM image quality. Under these conditions, the structure of cellular F-  
136 actin was resolved to 6.1 Å (Figure 1–figure supplement 2).

137 Keratins form a complex filamentous network, including thick bundles containing numerous filaments,  
138 meshworks, in which filaments are often crossing and interacting with each other, as well as long  
139 stretches of individual filaments (Figure 1C, E, Figure 1–figure supplement 1D). Keratin filaments  
140 exhibit a wide range of shapes suggesting a high degree of flexibility. While some filaments are straight  
141 over long distances (several hundreds of nm), others exhibit a wavy appearance (Figure 1E, arrow).  
142 Additionally, highly bent keratin filaments are frequently detected (Figure 1F, Figure 1–figure  
143 supplement 1D). We traced 65 of these highly bent filaments and determined their minimal apparent  
144 persistence length (contour length upon 90° turn, Figure 1H). Keratin 5/14 filaments are able to  
145 undergo a 90° turn within  $118.4 \pm 39.2$  nm (Figure 1G), similar to distances observed for nuclear lamins  
146 (40, 45). These measurements were conducted only on the sub-population of highly bent filaments

147 and not on the full range of shapes detected (e.g. straight filaments), as their varying behavior  
148 prohibited us to describe all of them with a single measure (46). Interestingly, some filaments  
149 undertake even 180° turns within a few hundred nanometers without breaking and change directions  
150 multiple times within the inspected field of view (Figure 1F). In agreement with previous *in vitro*  
151 assembled keratin analyses, the remarkable flexibility of keratin filaments supports their ability to  
152 maintain filament integrity even under extreme conditions (47-49).

153

### 154 **Heterogeneity in filament diameter and helical pattern**

155 To obtain deeper insights into the architecture of keratin filaments, we extracted and structurally  
156 averaged 55 nm long straight keratin segments picked along filaments in ~1700 cryo-EM micrographs  
157 (50, 51). A helical pattern that spirals along the long filament axis can be detected in several class  
158 averaged structures (Figure 2A, Figure 2–figure supplement 1A). While several structural classes show  
159 a clear helical pattern, others reveal elongated, rather straight sub-structures without an apparent  
160 helical symmetry (Figure 2A, bottom, Figure 2–figure supplement 1A). Transition regions between the  
161 two distinguished patterns can also be detected (Figure 2A, arrows). The mean diameter of keratin  
162 filaments, as determined by direct measurement of intensity line-profiles through the class averages,  
163 is  $10.1 \pm 0.5$  nm (Figure 2B, C), in agreement with previous observations (19). A mean intensity line-  
164 profile through a lateral average of the most populated classes defined the edges of the filaments as  
165 well as a central density peak (Figure 2C). The outer boundaries of the filaments show the highest  
166 electron density values and therefore are their most pronounced structural features (i.e., the filament  
167 diameter), while a central density peak with slightly lower intensity is also apparent. This analysis  
168 further revealed a subset of structural classes with a much larger diameter than the majority of  
169 filaments (Figure 2D). Intensity line profiles of a thicker class (black asterisk) and a more frequently  
170 detected class (blue asterisk) indicate a 30% difference in filament diameter, 13.2 nm vs 10.1 nm,  
171 respectively (Figure 2E). Moreover, the internal structure of the thicker classes diverges from the



172 classes shown in Figure 2A. Specifically, some classes reveal two distinct linear electron densities within  
173 the filament (Figure 2D, arrowheads), indicating a less dense packing of the individual protofilaments  
174 as compared to the compact classes. Others capture transitions between a thinner and a thicker region  
175 along an individual filament (Figure 2D, arrows). These findings indicate deviations in the organization  
176 of protofilaments, reflecting structural heterogeneity along individual filaments.

177 In order to determine the repeat distances of the helical patterns observed in the class averages we  
178 calculated autocorrelation spectra for each helical class (Figure 2F, Figure 2–figure supplement 1D).  
179 Using this approach, the repeating units along the length of the filament can be determined (52). We  
180 found that the repeat distance of the helical pattern varies dramatically among different classes,  
181 ranging from  $\sim 132$  Å to  $\sim 163$  Å (Figure 2F). Between these two extremes numerous distinct values for  
182 the repeat distance of the helical pattern can also be identified (Figure 2–figure supplement 1D). Since  
183 keratin filaments are very flexible and they form a 3D network in cells, we exploited the possibility that  
184 the different repeat distances reflect filaments that are oriented out of plane. The projection of a tilted  
185 filament in our cryo-EM micrographs would therefore yield classes with an apparent shorter repeating  
186 pattern. In this case, the class with the longest repeating distance would reflect the untilted filament,  
187 while all other repeating patterns would originate from different degrees of tilting. Based upon this  
188 reasoning, we tilted and projected the class with a repeat distance of  $163$  Å *in silico* and retrieved  
189 similar repeat distances as seen in the real classes (Figure 2 I). We showed that a tilt of up to  $\sim 34^\circ$  can  
190 induce shortening of the repeating pattern from  $163$  Å to  $132$  Å (Figure 2 G, H). Therefore, tilting  
191 between  $0^\circ - 34^\circ$  would explain the variations that were detected in the repeating pattern of the  
192 keratin classes (Figure 2 I). With ice thicknesses of up to  $\sim 300$  nm and a minimal apparent persistence  
193 length of  $\sim 118$  nm, this amount of tilting can be expected and further analysis by cryo-ET revealed that  
194 even higher degrees of tilting are possible (see below).

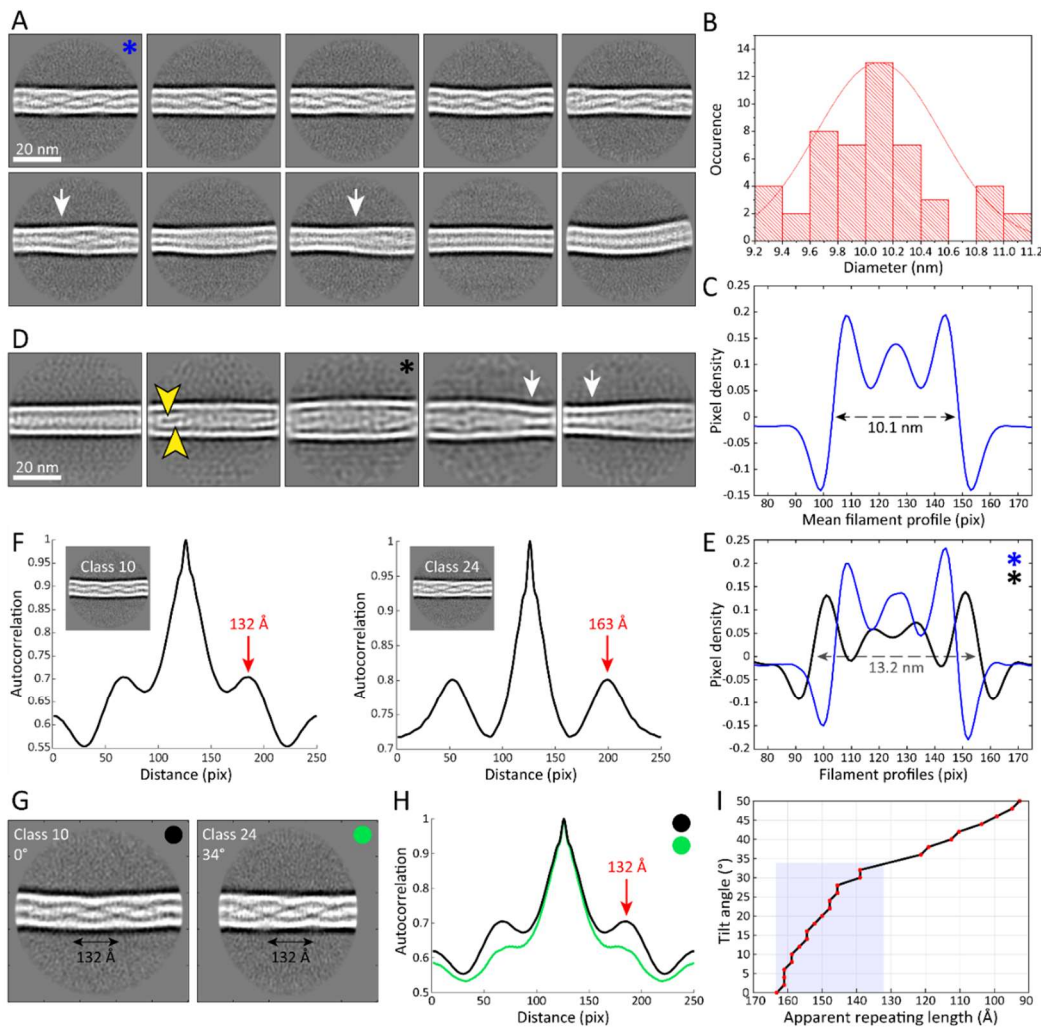

195

196 **Figure 2. The architecture and heterogeneity of keratin filaments.**

197 (A) Ten of the most populated 2D class averages of keratin segments. High electron density is shown in white. Arrows indicate  
 198 transition regions between helical and straight-line patterns. (B) Distribution of filament diameters as measured in 50 2D class  
 199 averages (Figure 2–figure supplement 1A). (C) Mean intensity line-profile through all classes used in (B). The mean filament  
 200 diameter (10.1 nm) is indicated. (D) Subset of keratin class averages showing larger filament diameters. Two individual  
 201 filamentous densities are often detected within a filament (yellow arrowheads). Additionally, transition regions between  
 202 thinner and thicker filament regions are detected (white arrows). (E) Intensity line-profiles through a narrow and a wide class  
 203 indicated by blue and black asterisk (in (A) and (D)), respectively. Diameters of 10.1 nm and 13.2 nm (arrow) were detected.  
 204 (F) Autocorrelation spectra of the displayed keratin classes (insets). Peaks of the autocorrelation function corresponding to  
 205 the distance between repetitive elements along the filament are indicated (arrows). (G) To show that out-of-plane tilting of  
 206 KIFs can shift the autocorrelation peaks, Class 24 was tilted *in silico* by 34°, while Class 10 is untilted. The apparent repeating  
 207 distance of both classes is indicated. (H) Autocorrelation spectra of the classes shown in (G). After tilting of Class 24 by 34°,  
 208 both classes show an autocorrelation peak at the same marked position, an indicator that filament tilting might be the reason

209 for the different repeat distances observed in the 2D classes. Green and black dots indicate which curve belongs to which  
210 class in (G). (I) Dependence of the apparent repeating length (autocorrelation peaks) on the filament tilt angle, measured by  
211 tilting Class 24 from 0° to 50° and calculating corresponding autocorrelation spectra. The gray area indicates the range of  
212 repeat distances found in keratin 2D classes.

213

## 214 **Reconstituting keratin filaments from the class averages**

215 The 2D class averages allowed us to identify structural differences in 55 nm long keratin segments. To  
216 understand how these structural features are organized at the level of long keratin filaments, it was  
217 important to determine how the class averages are arranged along keratin filaments which are up to  
218 several hundreds of nanometers in length. For this purpose, we utilized a back-mapping strategy that  
219 permits the reconstitution of the original filament out of 2D class averages (Figure 2–figure supplement  
220 1A, B) (41, 53). Therefore, every segment was represented by its corresponding 2D class image, which  
221 was inversely transformed, so that it matched the original orientation of the raw segment. Then it was  
222 plotted at the original coordinate position, where the raw segment was selected from the electron  
223 micrographs. In this fashion, we assembled the original keratin filaments made out of the respective  
224 2D class averages (Figure 3–figure supplement 1A), which were subsequently extracted and  
225 straightened. Since these reconstituted filaments are assembled from class averages, their signal-to-  
226 noise ratio is drastically improved compared to the raw filaments. This approach allowed us to study  
227 long stretches of keratin filaments with improved resolution up to ~12 Å (Figure 3, Figure 2–figure  
228 supplement 1C).

229 The appearance of these reconstituted keratin filaments is very heterogenous (Figure 3, Figure 3–  
230 figure supplement 1). Overall, they consist of patches of helical regions with clear repetitive patterns  
231 (Figure 3A, red, E), which are frequently interrupted by straight patterned stretches with less defined  
232 features (Figure 3A, yellow, E). The helical as well as the straight-line stretches are variable in length  
233 and frequency. While some filaments consist of mostly helical stretches, others are mixed or exhibit a  
234 mostly straight-line appearance (Figure 3E, Figure 3–figure supplement 1B). Additionally, the diameter

235 fluctuates along a single filament (Figure 3B, D). For example, KIFs have regions of increased width up  
236 to 13.2 nm that often allow the identification of individual sub-chains (Figure 3B, E), as well as thinner  
237 regions with widths down to 9.2 nm (Figure 3D, E). The thinner regions usually display a straight  
238 pattern, whereas not all straight regions show a decrease in diameter.

239 Interestingly, the reconstituted filaments revealed that helical regions with different repeat distances,  
240 identified in the 2D class averages (Figure 2), can co-exist along a single filament (Figure 3C). This  
241 indicates that individual filaments changed their tilt angle along the course of the filament and ran  
242 through different z-heights of the ghost cell volume. Helical patterns with different repeat distances,  
243 indicating different tilt angles, lie in close proximity along KIFs, where they appear to transition  
244 smoothly into each other. These structural transitions reveal that keratin filaments constantly fluctuate  
245 in the z-direction and thus appear to be as flexible in the z-direction as they are in the xy plane.

246 Overall, reconstituted keratin filaments reveal an enormous amount of structural heterogeneity  
247 (Figure 3E, Figure 3–figure supplement 1C). Every filament examined displays a unique phenotype,  
248 which demonstrates that keratin filaments are as versatile as the challenges they encounter in a living  
249 cell.

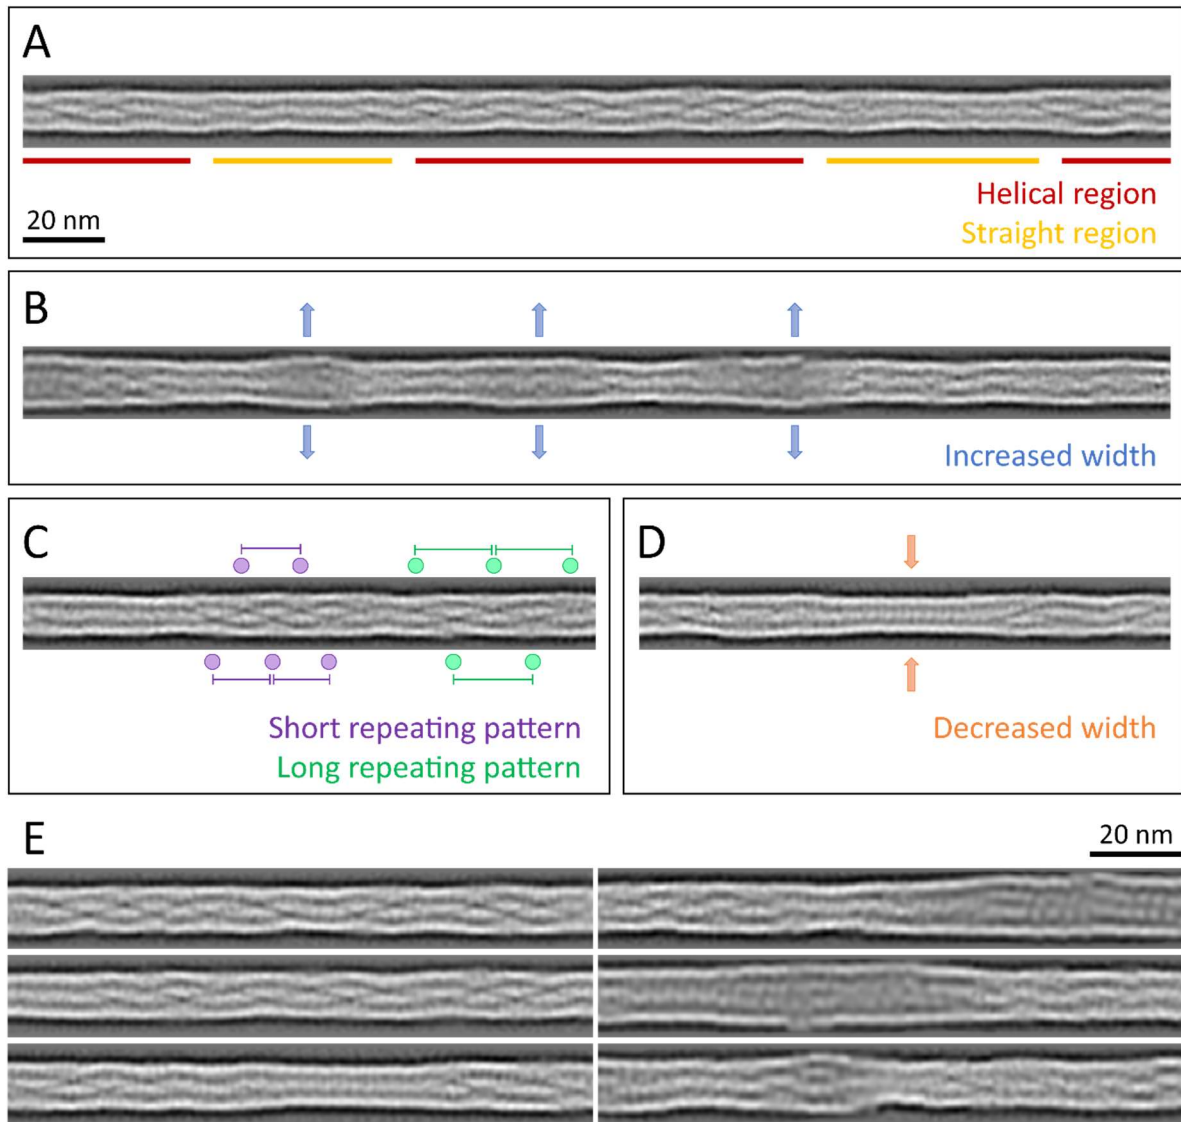

250

251 **Figure 3. Structural polymorphism along keratin filaments.**

252 Reconstituted filaments provide a realistic view of the KIFs at higher resolution (see Materials and Methods). (A) – (D) Scale  
253 bar: 20 nm. (A) A typical keratin filament consisting of various regions with helical and straight-line patterns, indicated by red  
254 and yellow lines, respectively. (B) Keratin filament displaying diameter fluctuations. Areas of increased diameter are indicated  
255 (blue arrows). (C) Keratin filament showing helical patterns exhibiting different repeat distances, indicating modulations  
256 within the ice layer. Short repeating patterns (purple) indicate higher tilt angles in comparison to longer repeating patterns  
257 of in-plane filament stretches (green). (D) Keratin filament displaying diameter fluctuations. Areas of decreased diameter are  
258 indicated (orange arrows). (E) A collage of six reconstituted keratin filaments showing structural diversity.

259

260

261 **Keratin filaments are hollow cylinders with an internal electron dense core**

262 A careful analysis of our dataset revealed several cryo-EM micrographs and multiple cryo-tomograms  
263 (21 out of 44) which contain KIFs that undergo a 90° turn along the thickness of the sample and  
264 therefore allow the observation of direct cross sections of the keratin filaments. This behavior is quite  
265 remarkable, as it was never seen in tomograms (n = 225) of cellular vimentin intermediate filaments,  
266 imaged within detergent extracted mouse embryonic fibroblasts (MEF) (unpublished, Figure 4–figure  
267 supplement 1A, B). Analysis of cross sections revealed that keratin filaments are hollow cylinders, in  
268 which an internal electron dense core is found (Figure 4A-E). This finding agrees with previous studies,  
269 which predicted that keratins contain internal mass, but less than anticipated for a completely filled  
270 filament (15, 29-34). Moreover, we could identify individual sub-filaments, which form a hexameric  
271 ring structure in cross section (Figure 4B). Based on this geometry and previous literature, it is likely  
272 that the sub-structures represent tetrameric protofilaments and therefore the mature filament would  
273 be composed of ~6 protofilaments to yield ~24 polypeptides in cross section (15). This agrees with  
274 previous mass-per-unit-length analyses of epidermal keratins and keratins from simple epithelia (28,  
275 29). Depending on the individual filament and tomographic slice, the number of visible protofilaments  
276 varies, which might indicate polymorphism, i.e. a variable number of protofilaments building the KIF.  
277 However, it might also be an imaging artifact. When following a filament in cross section through the  
278 tomographic volume, in certain slices densities of neighboring protofilaments seem to merge into one  
279 continuous structure, indicating that there are positions along the filament where the protofilaments  
280 are interacting so tightly that they could not be resolved individually (Figure 4E, Figure 4–figure  
281 supplement 1C). Other positions reveal more than six protofilaments, which may reflect overlap  
282 regions between tetramers along the keratin filaments.

283 To study the number of protofilaments in more detail, we selected 710 cross-sectional views of  
284 filaments found within the cryo-tomograms and subjected them to 2D classification, revealing a  
285 symmetric hexameric class (Figure 4F). Six individual protofilaments can be clearly distinguished in the  
286 ring (arrowheads), which agrees with our studies of the raw data. As expected, additional classes were

287 found showing deviations from this hexameric structure (Figure 4–figure supplement 1D). These  
288 structural differences may represent actual changes in symmetry or deviations from a perfect  
289 perpendicular cross section.

290 Finally, to get an impression of a mature keratin filament in three dimensions, we generated a low-  
291 resolution 3D model of a keratin filament from our dataset of 55 nm long segments using the Relion  
292 software package (50, 51). By randomizing the rotational angle along the filament axis, a template-free  
293 unbiased model was generated (Figure 4G). The 3D model strengthens our findings that keratin  
294 filaments are formed as hollow cylinders with a central electron density. Due to randomization of the  
295 rotation angle, the individual protofilaments are not resolved in this structure, however, it provides a  
296 view of the central density and the overall dimensions of the K5/14 intermediate filaments.

297

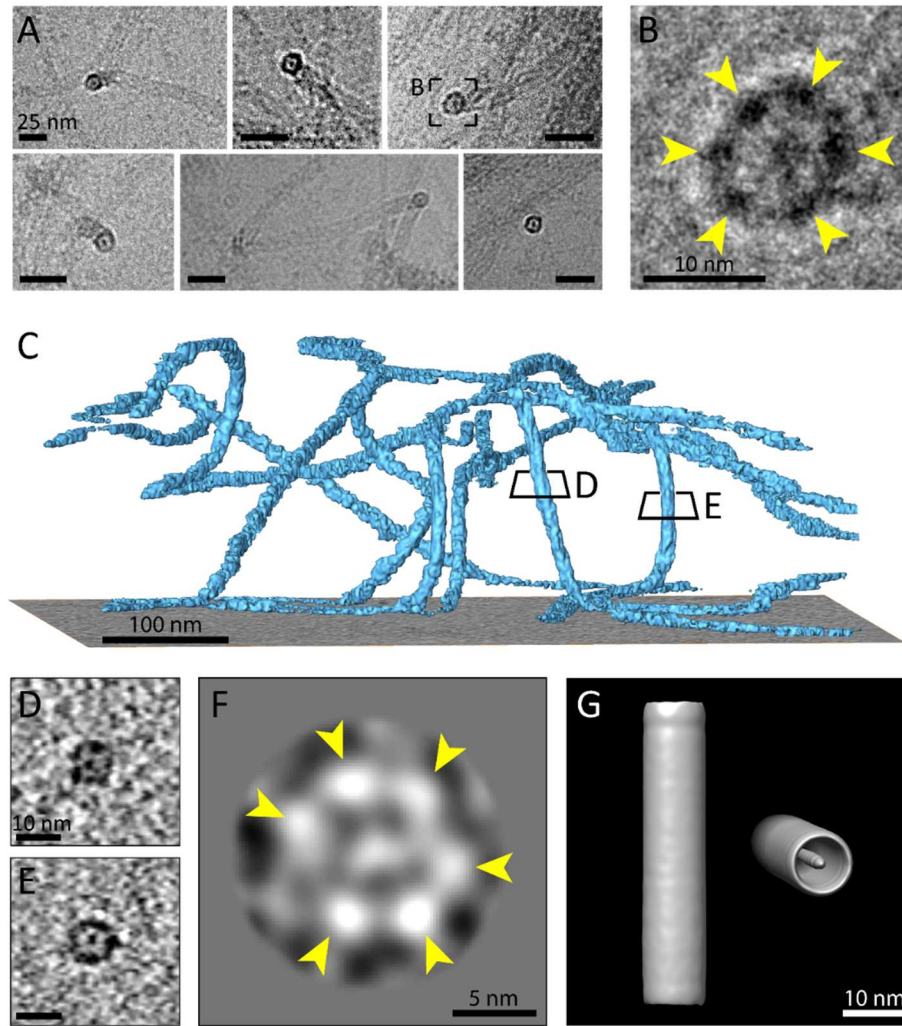

298

299 **Figure 4. Multiple protofilaments and an internal electron dense core are canonical components of keratin filaments.**

300 (A) Cross section views of keratin filaments detected within the cryo-EM micrographs of ghost cells. An electron dense core  
301 is visible in the center of the keratin tube. Scale bars: 25 nm. (B) Zoomed-in view of the area boxed in (A). The cross section  
302 view reveals an internal core surrounded by six protofilaments as constituents of the tube (yellow arrowheads). (C) A surface  
303 rendered tomogram of a ghost cell was rotated in order to show the modulation of the keratin filaments within the ice layer.  
304 The three-dimensional keratin network is visualized (light blue). The level of the support is shown as a gray colored slice.  
305 Tomographic slices through vertically oriented filaments showing cross section views are indicated by boxes. (D) - (E) 7 nm  
306 thick xy-slices of the areas indicated in (C), showing KIFs as tube-like structures with a central density. Individual  
307 protofilaments can be identified. Scale bars: 10 nm. (F) A 2D class averaged structure of cross section views extracted from  
308 19 individual regions of vertically oriented filaments, revealing the six individual protofilaments constituting the keratin  
309 filament tube (yellow arrowheads). (G) Low resolution 3D model indicating the overall dimensions of a keratin filament and  
310 the presence of the central density. The structure was calculated template-free by randomizing the rotation angle of  
311 extracted keratin segments. Left: Side view. Right: Tilted cross section view revealing internal electron dense core.



312

## 313 Discussion

314 Keratin intermediate filaments are major components of the cytoskeleton that are involved in many  
315 cellular processes (54-56). However, due to their flexibility, heterogeneity and yet to be resolved  
316 symmetry, a high-resolution structure of keratin filaments in their native state has not been obtained  
317 to date. In this study, we describe novel insights into the architecture of *in vivo* assembled K5/K14  
318 filaments by imaging them directly within ghost cells. This approach has enabled us to study native  
319 KIFs containing all their post-translational modifications, which are known to play an important role in  
320 their assembly and function (57). Moreover, this approach circumvents the need of denaturing and  
321 renaturing the proteins prior to *in vitro* assembly, a step which likely increases structural polymorphism  
322 (15).

323 The K5/K14 filaments were detected in ghost cells as individual, separated filaments or in bundles. In  
324 this study we have focused on individual filaments for technical reasons, as KIF bundles are dense,  
325 highly complex structures and would be unsuited for our averaging procedures (58). Individual  
326 filaments were found to be very flexible and showed a high degree of bending within a few hundred  
327 nanometers. We determined the minimal apparent persistence length of highly bent KIFs to be 118.4  
328  $\pm$  39.2 nm. Thus, intact keratin filaments can undergo a 90° turn within a distance of 2 – 3 dimer lengths  
329 (dimer length  $\sim$ 44 nm (24, 59)). When compared to microtubules or actin filaments, which have  
330 persistence lengths of  $\sim$ 7 – 22  $\mu$ m and several mm, respectively, keratin filaments are much more  
331 flexible (60). Their long  $\alpha$ -helical building blocks allow them to accommodate high bending, similar to  
332 nuclear lamins (40, 61). Previous studies showed that the persistence length of K8/K18 filaments can  
333 vary significantly between 300 – 650 nm depending on the method used (46, 62, 63). However, within  
334 the cell, individual filaments are incorporated into a network and therefore are not in a relaxed  
335 equilibrium state as expected *in vitro*. Thus, we suggest  $\sim$ 118 nm as the minimal apparent persistence  
336 length of the K5/K14 sub-population of highly bent filaments.

337 The high flexibility and modulation of keratin filament orientation is also apparent as filaments can  
338 span through the entire thickness of the ice on a cryo-EM grid. The filaments are often tilted out of the  
339 xy plane and form a wavy network in all three dimensions. Cryo-tomograms of ghost cells allowed us  
340 to follow individual filaments through different heights of the cell and show that the filaments can  
341 undergo 90° turns within a thickness of <300 nm (Figure 4). Interestingly, other IFs such as vimentin  
342 might not be as flexible, as they seem to be fluctuating less through the different heights of the ghost  
343 cells (Figure 4–figure supplement 1).

344 The bending property of keratin filaments has enabled us to analyze cross section views and therefore  
345 to directly reveal that they are built from 6 sub-filaments surrounding an electron dense core. This  
346 suggests, that these filaments are composed of 6 tetrameric protofilaments, yielding 24 polypeptides  
347 in cross section. In support of this finding, previous mass-per-unit-length studies identified 21 – 25  
348 polypeptides per cross section of reassembled epidermal keratin extracts or in recombinant K8/K18  
349 filaments prepared *in vitro* (28, 29). It is unlikely that the identified sub-filaments represent protofibrils,  
350 i.e. octameric assemblies, as this would yield 48 polypeptides in cross section, which does not agree  
351 with previous studies. However, MPL studies also found filament populations with a slightly higher or  
352 lower numbers of subunits, indicating a polymorphic composition of KIFs. Our data support this, as  
353 different 2D classes and raw cross-sectional views reveal a divergence from the hexameric  
354 arrangement that would potentially accommodate the previously reported polymorphism.

355 It is noteworthy that the keratin filaments are not completely filled, but possess a distinct density in  
356 the center that is separated from the protofilaments forming the filament tube. This is very similar to  
357 the trichocyte keratins found in wool, where an internal core was also identified (30, 64, 65). This  
358 seems to be a feature that epidermal and trichocyte keratins have in common, although their amino  
359 acid sequences, as well as their arrangement in cells and their functions differ. The internal density  
360 may correspond to an additional protofilament (30) or another cellular component.

361 Polymorphism, i.e. a variable number of protofilaments composing keratin filaments, might also  
362 explain the alterations of the helical pattern seen in the 2D class averages (28, 29, 66). Structural  
363 flexibility and changes in helical packing of the filament may provide structural support for the elastic  
364 nature of the keratin network and would help to explain their high resistance to breakage (4, 46). This  
365 feature of keratin filaments would coincide with their task to adapt to different mechanical stresses  
366 while maintaining a stable network. Our results also show large heterogeneities in the filament  
367 thickness using 2D classification and filament reconstitution methods. Although the most prevalent  
368 diameter detected in keratin filaments is 10.1 nm, the diameter can fluctuate between 9.2 – 13.2 nm.  
369 This type of heterogeneity has been previously described for several types of IFs (28, 29, 66) and is  
370 thought to reflect a varying number of subunits per cross section. However, our results show that  
371 regions of increased diameter frequently yield insights into the subunit organization of the filament,  
372 indicating that the individual protofilaments are more loosely packed. The increased widths may  
373 therefore also reflect regions where rearrangements of the filament take place, subunits might be  
374 exchanged (67-70) or interactions with keratin binding proteins might occur. Further, they might  
375 reflect areas of local post-translational modifications or regions where filaments were locally damaged.  
376 Interestingly, these regions are not restricted to the edges of filaments, but can occur in the mid  
377 regions of already assembled filaments. Filament stretches with diameters smaller than 10 nm might  
378 reflect either supercoiling or regions that have experienced a greater degree of localized mechanical  
379 stress. Previous studies showed that upon stretching beyond 200 %, keratins adopt a plastic behavior  
380 that is accompanied by strain hardening and a significant reduction in diameter (46, 71, 72), which is  
381 thought to be mainly a result of  $\alpha$ -helix to  $\beta$ -sheet transitions of the coiled-coil domains (71-73). Our  
382 findings that there are thinner regions in keratin filaments may reflect local domains where extensive  
383 forces were applied to the filament network and the filaments adapted by unfolding their coiled-coil  
384 domains, leading to a reduction in diameter.

385 Overall, our results demonstrate that structural polymorphism is an intrinsic property of keratin  
386 filaments that were assembled within epithelial cells. Especially when compared to the other

387 components of the cytoskeleton, microtubules and actin filaments, which adapt a highly uniform  
388 arrangement, the structural heterogeneity of keratin filaments is clearly exceptional.

389 Our findings demonstrate the importance of determining a high-resolution structure of keratin  
390 filaments in order to understand the details of their assembly states and the functional significance of  
391 their heterogeneity in cells. Analyzing *in vivo* assembled filaments provides an approach to study the  
392 structure of keratins in their native state with their original post-translational modifications.  
393 Understanding the high-resolution structure of keratin filaments would also provide a foundation for  
394 determining how keratin mutations affect their structure and how they interact with binding partners.  
395 Cryo-EM and cryo-ET are the methods of choice for unravelling the complexities of the 3D structure of  
396 mature keratin filaments, as the coordinated use of these techniques can resolve both their flexibility  
397 and heterogeneity. Given the rapid advances in cryo-EM imaging, sample preparation and image  
398 processing, we anticipate that the structural analysis of keratin intermediate filaments will continue to  
399 provide new insights into their cellular structure and functions.

400

## 401 Material and Methods

### 402 **Generation of the K5/K14\_1 cell line**

403 Mouse keratinocytes lacking the entire type I keratin cluster (*Ktvl<sup>-/-</sup>*) but stably transfected with K14  
404 (38) were cultured on Collagen I (bovine, CellSystems) coated dishes at 32 °C and 5% CO<sub>2</sub> in calcium-  
405 depleted FAD medium in the presence of puromycin (LabForce, 8 µg/ml medium). Confluent cells were  
406 trypsinized using 2.5 x trypsin/EDTA solution (Sigma-Aldrich, T4174) and re-seeded at a maximum  
407 splitting ratio of 1:2. To knock-out the K6a and K6b genes, cells were transfected with the pX458  
408 (pSpCas9(BB)-2A-GFP) plasmid (Addgene) carrying a GFP-tagged Cas9 and a guideRNA insert targeting  
409 both the K6a and K6b gene (guideRNA sequence: GAGCCACCGCTGCCCCGGGAG). Transfection using  
410 electroporation was performed according to the manufacturer's protocol using a P3 primary cell 4D-  
411 Nucleofector kit (Lonza) and program 138 for human keratinocytes, followed by another round of

412 transfection using jetPRIME (Polyplus transfection). Next, genomic DNA was extracted from clonal cell  
413 lines using the GenElute Mammalian Genomic DNA kit (Sigma-Aldrich) and the K6a and K6b gene  
414 fractions where the indel mutations were expected were amplified by PCR. PCR fragments were  
415 sequenced (Microsynth) and the indel mutation spectrum was analyzed using the TIDE webtool  
416 (<https://tide.nki.nl/>). The K5/K14\_1 clone was identified as homogenous K6a knockout and  
417 heterogenous K6b knockout and was therefore used for all studies. To further verify the knockout, PCR  
418 fragments were cloned into the pGEM-T Easy vector (Promega, A1360) and amplified in DH5 $\alpha$  cells.  
419 Bacterial clones carrying individual gene sequences of K6a or K6b were picked and amplified, plasmids  
420 were extracted and sequenced (Microsynth). By analyzing 19 K6a and 22 K6b sequences, the  
421 homogenous K6a and heterogenous K6b knockout were verified.

## 422 **Immunostaining**

423 The *Ktyl*<sup>-/-</sup> K14 and K5/K14\_1 cells were seeded on Collagen I coated glass cover slips in cell culture  
424 dishes and incubated overnight at 32 °C and in 5% CO<sub>2</sub>. For staining with keratin antibodies, cells were  
425 fixed for 5 min using ice-cold 99.9% anhydrous methanol (Alfa Aesar, 41838). Non-specific antibody  
426 binding sites were blocked by incubating the cover slips for 30 min in blocking buffer (1% BSA,  
427 22.52 mg/ml glycine in PBS with 0.1% Tween (PBS-T)). Next, cover slips were incubated for 1 h at room  
428 temperature with mouse anti-mouse Keratin 14 (LL02, Thermo Fisher, MA5-11599, 1:100 – 1:10),  
429 rabbit anti-mouse Keratin 5 (BioLegend, 905503, 1:500) or rabbit anti-mouse Keratin 6a (BioLegend,  
430 905702, 1:500) in 1% BSA in 0.1% PBS-T. It should be noted here that the K6a antibody used is a  
431 polyclonal antibody, which is suspected to bind to the K6b protein as well, due to their high sequence  
432 identity (92.6%). After 3x 5 min washing steps in PBS, cover slips were incubated with Cy3 donkey anti-  
433 rabbit (Jackson Immuno Research, 711-165-152, 1:100) or FITC donkey anti-mouse (Jackson Immuno  
434 Research, 715-095-150, 1:100) secondary antibodies in 1% BSA in 0.1% PBS-T. Cells were washed 3x  
435 for 5 min in PBS, before nuclei were stained with Hoechst 33342 (Sigma-Aldrich, B2261, 1:10,000) for  
436 10 – 20 min at room temperature. After a final wash step 3x for 5 min in PBS, the cover slips were  
437 mounted on glass slides with Dako mounting medium (Agilent, S3023) or Prolong Glass Anti-Fade

438 (Thermo Fisher, P36980). Confocal imaging for Figure 1 was carried out with a laser scanning confocal  
439 microscope (Nikon A1R confocal microscope, Nikon) using an oil immersion objective lens (Plan Apo  
440 60X Oil objective, 1.4 NA, Nikon). Keratin was excited with a 488 nm wavelength laser and the optical  
441 sections were imaged at 100 nm intervals. Maximum intensity projections of the Z-stacks are  
442 presented. Keratin networks for Figure 1–figure supplement 1 were imaged using a spinning disk  
443 confocal laser scanning microscope (Olympus IXplore SpinSR10 with YOKOGAWA CSU-W1 spinning  
444 disk). 3D confocal stacks were acquired with a UPLSAPO UPlan S Apo 60x/1.3 OIL objective (Olympus).  
445 Fluorescent proteins were excited at 405 nm (50 mW, 10 % laser power), 488 nm (100 mW, 15 % laser  
446 power) and 561 nm (100 mW, 5 % laser power).

#### 447 **Sample preparation for cryo-EM and cryo-ET**

448 K5/K14\_1 cells were seeded on glow-discharged Collagen I coated holey carbon gold EM grids (Au R2/1,  
449 200 mesh, Quantifoil) and incubated overnight at 32 °C and in 5% CO<sub>2</sub>. The grids were rinsed in washing  
450 buffer (1x PBS, 2 mM MgCl<sub>2</sub>), cells were permeabilized for 15 – 20 s in permeabilization buffer (1x PBS,  
451 0.1% Triton X-100, 600 mM KCl, 10 mM MgCl<sub>2</sub> and protease inhibitors), and rinsed again in PBS. Next,  
452 the grids were incubated with 2.5 units/μl benzonase (Merck, 71206-3) in washing buffer for 30 min  
453 and washed again before vitrification in liquid ethane using a manual plunge freezing device. For cryo-  
454 ET samples, 10 nm gold fiducial markers (Aurion, Netherlands) were added to the grids right before  
455 freezing.

#### 456 **Cryo-EM and cryo-ET data acquisition**

457 The grids were analyzed using a 300 kV Titan Krios electron microscope (Thermo Fisher) equipped with  
458 a K2 Summit direct electron detector (Gatan) mounted on a post-column energy filter (Gatan). Cryo-  
459 EM micrographs were acquired in zero-loss energy mode using a 20 eV slit. Data were recorded with  
460 SerialEM 3.5.8 in low dose mode (74). Micrographs were acquired at nominal magnifications of  
461 46,511 x with a pixel size of 1.075 Å, 28,571 x with a pixel size of 1.75 Å and 22,665 x with a pixel size  
462 of 2.206 Å. A defocus range between -0.5 and -3.5 μm was chosen. Dose-fractionation was used with

463 a frame exposure of 0.2 s with a total exposure time of 10 s (50 frames in total). This corresponds to a  
464 total electron dose of  $\sim 20 \text{ e}/\text{\AA}^2$  for the 22,665 x dataset,  $\sim 41 \text{ e}/\text{\AA}^2$  for the 28,571 x and  $\sim 84 \text{ e}/\text{\AA}^2$  for the  
465 46,511 x dataset.

466 Tilt series were acquired in zero-loss energy mode with a 20 eV slit at a nominal magnification of  
467 28,571 x, resulting in a pixel size of 1.75  $\text{\AA}$  and a defocus of  $-3 \mu\text{m}$ . A bidirectional tilt scheme with a tilt  
468 range of  $\pm 60^\circ$  and an increment of  $3^\circ$  was chosen, corresponding to 41 projections per tilt series and  
469 a total accumulative electron dose of  $\sim 89 \text{ e}/\text{\AA}^2$ . SerialEM 3.5.8 in low dose mode was used for data  
470 acquisition (74).

#### 471 **Minimal apparent persistence length measurements**

472 Highly bent keratin filaments were identified in electron micrographs and traced with Fiji using the  
473 segmented line tool including spline fit. Minimal filament contour lengths that undergo a  $90^\circ$  turn were  
474 traced. The persistence length is defined as the distance along a filament at which the tangent-tangent  
475 correlation function along the contour length decays, this occurs after a  $90^\circ$  turn (75). However, since  
476 our sample is out of equilibrium, as individual filaments are entangled in a network and absorbed to  
477 the EM grid, and filaments are imaged in 2D, only an apparent persistence length is described. Further,  
478 only highly bent filaments were considered in this analysis, yielding a minimal apparent persistence  
479 length, as the whole filament population is diverse and cannot be described as a single state.

#### 480 **Cryo-EM data processing**

481 1,860 cryo-EM micrographs at a magnification of 22,665x were processed with RELION 2.1 and  
482 RELION 3.0 using the helical toolbox (50, 51, 76). Frame-based motion correction and dose-weighting  
483 were performed using MotionCor2 (77). The contrast transfer function was estimated using CTFFIND4  
484 (78). Low-quality micrographs showing high defocus, high astigmatism or low resolution were  
485 excluded, resulting in 1,763 micrographs used for further processing steps. Keratin filaments were  
486 either picked manually or automatically using the RELION helical toolbox. To generate a template for  
487 autopicking, 55,073 keratin particles were picked manually as start-to-end helices, extracted with a

488 box size of 250 pixels (~55 nm) and 2D classified twice to create classes with straight keratin segments.  
489 These classes served as a reference for automated picking of 505,211 particles. For manual picking,  
490 298,056 particles were selected as start-to-end helices. Particles were extracted in boxes of 250 pixels,  
491 corresponding to ~55 nm, or 164 pix, corresponding to ~36 nm, with an inter-box distance of 50 Å.  
492 Iterative 2D classification procedures were performed, using a spherical mask of 500 Å or 356 Å,  
493 respectively.

494 Keratin filament segments, 55 nm in length, were classified to yield 305,495 particles in straight classes.  
495 Autocorrelation spectra were calculated with MATLAB (2019a, MathWorks). The filament diameter  
496 was measured by plotting intensity line-profiles of all classes using MATLAB and measuring the area  
497 where the intensity lies above zero. OriginPro 2018 software (OriginLab Corporation) was used to plot  
498 the diameter distribution. Intensity line-profiles of each class were generated in MATLAB by averaging  
499 all lateral sections through the segment. A mean intensity line-profile was generated by averaging all  
500 classes of similar diameter (Figure 2–figure supplement 1A).

501 Segments with a box size of 36 nm were used for *in silico* filament reconstitution. Filament  
502 reconstitution was performed as previously reported (41) and described below with classes of  
503 automatically, as well as manually, picked particles.

504 Actin filaments were processed identically to keratin filaments to guarantee comparability. To  
505 generate a template for autopicking, 22,228 actin particles were picked manually as start-to-end  
506 helices, extracted with a box size of 164 pixels (~36 nm) and 2D classified twice to create classes with  
507 straight actin segments. These classes served as a reference for automated picking of  
508 693,903 particles. Particles were extracted in boxes of 164 pixels, corresponding to ~36 nm, with an  
509 inter-box distance of 50 Å. Multiple rounds of 2D classification were performed, using a spherical mask  
510 of 356 Å. 405,044 particles from the highest resolved 2D classes were used for 3D classification into  
511 5 classes. The highest resolved 3D class, containing 174,954 particles, was projected to 3D refinement.  
512 The final unmasked map showed a resolution of 7.38 Å, based on the gold standard Fourier shell



513 correlation (FSC) 0.143 criterion (50, 79). The structure was sharpened to 6.13 Å using an isotropic  
514 B-factor of -276 Å<sup>2</sup>.

### 515 **Cryo-ET data processing**

516 Tilt series were processed using the IMOD workflow, including contrast transfer function (CTF)  
517 correction (80). For visualization purposes, a SIRT-like filter according to 10 iterations was applied  
518 during tomogram reconstruction. Cellular structures present in the tomograms were manually  
519 segmented and visualized using the Amira 5.6.0 software package (Thermo Fischer Scientific). 710  
520 cross section views of keratin filaments were picked in 21 tomograms and reconstructed as sub-  
521 tomograms using IMOD. Central 2D slices were extracted from the sub-tomograms and utilized for 2D  
522 classification in RELION.

### 523 **Reconstitution of keratin filaments**

524 To generate reconstituted filaments a back-mapping strategy was pursued in MATLAB, using the  
525 keratin segments which were used for 2D classification. First, all particles belonging to the same  
526 filament were grouped. Filament assignments were made based on the helical tube ID defined by  
527 RELION for every particle. Next, all particles belonging to the same filament were sorted in ascending  
528 order based on their picking coordinates. Then, their corresponding 2D class images were inversely  
529 transformed, so that their orientation matches the original orientation of the raw segments in the cryo-  
530 EM micrographs. Next, the 2D class images were plotted at the original coordinates of the particles.  
531 To remove background noise, the classes were masked in the y-direction and only the central 132 Å  
532 were plotted. Since particles were picked with inter-box distances of 50 Å, while 2D classes have a box  
533 size of 360 Å, neighboring segments would strongly overlap. To avoid this, classes were cropped to not  
534 extend into neighboring particle positions, and only a small amount of overlap of <4 with soft edges  
535 was allowed to avoid cropped edges in slightly bent filaments. Reconstituted filaments were  
536 normalized to equal intensity. Next, a straightening procedure was applied as previously described to

537 extract, align and straighten the reconstituted filaments (81, 82). Validity of this approach was ensured  
538 by using high-resolution actin classes as a control.

### 539 **Analyzing helical and straight-line patterns in individual filaments**

540 Plots representing the order of helical and straight segments along individual filaments, represented  
541 by colored circles, were generated in MATLAB as previously described (53). 2D classes were grouped  
542 into helical or straight clusters based on their appearance. Next, each particle within a filament was  
543 represented by red or blue circles, depending on whether its corresponding 2D class belonged to the  
544 helical or straight cluster. In the analysis seen in Figure 3–figure supplement 1B, segments that  
545 originate from the same filament are plotted as columns of circles. Segments are sorted in ascending  
546 order based on their coordinates along the filament.

### 547 **3D reconstruction of a keratin filament**

548 305,495 uniform keratin segments from 55 nm boxes were selected by 2D classification and used for  
549 3D reconstruction. To generate a low-resolution 3D filament model, the rotation angle along the  
550 filament axis of all particles was randomized to prevent preferred orientations. Next, a filament was  
551 reconstructed using `relion_reconstruct`. The 3D model was visualized using Chimera (83).

### 552 **Data availability**

553 Representative cryo-ET data have been deposited in the Electron Microscopy Data Bank under  
554 accession code xxx.

555

556

557

## 558 Acknowledgements

559 This research was funded by the Swiss National Science Foundation Grant (31003A, 179418). M.S.W.  
560 was supported by the Forschungskredit of the University of Zurich [FK-18-041]. The Goldman  
561 laboratory is supported by grants 5PO1 GM096971 and RO1GM140108 from the National Institutes of  
562 Health. The authors would like to thank the Center for Microscopy and Image Analysis at the University  
563 of Zurich for providing support and equipment.

## 564 Author contributions

565 M. S. W. performed the CRISPR/Cas9 knockout, prepared samples, recorded and analyzed data.  
566 M. S. W and M. E. developed methods. M. S. W. and S. S. acquired fluorescent images. T. M. M.  
567 provided the *Ktyl<sup>-/-</sup>* K14 cell line and reviewed the manuscript. O. M. provided resources, funding and  
568 administration. M. S. W. together with R. D. G. and O. M. conceived the research and wrote the  
569 manuscript.

## 570 Declaration of interests

571 The authors declare no conflicts of interest.

572

573

574

## 575 References

- 576 1. Szeverenyi I, Cassidy AJ, Chung CW, Lee BT, Common JE, Ogg SC, et al. The Human  
577 Intermediate Filament Database: comprehensive information on a gene family involved in many  
578 human diseases. *Hum Mutat.* 2008;29(3):351-60.
- 579 2. Bragulla HH, Homberger DG. Structure and functions of keratin proteins in simple, stratified,  
580 keratinized and cornified epithelia. *J Anat.* 2009;214(4):516-59.
- 581 3. Toivola DM, Boor P, Alam C, Strnad P. Keratins in health and disease. *Current opinion in cell*  
582 *biology.* 2015;32:73-81.
- 583 4. Etienne-Manneville S. Cytoplasmic Intermediate Filaments in Cell Biology. *Annu Rev Cell Dev*  
584 *Biol.* 2018;34:1-28.
- 585 5. Pora A, Yoon S, Dreissen G, Hoffmann B, Merkel R, Windoffer R, et al. Regulation of keratin  
586 network dynamics by the mechanical properties of the environment in migrating cells. *Scientific*  
587 *reports.* 2020;10(1):4574.
- 588 6. Kolsch A, Windoffer R, Wurflinger T, Aach T, Leube RE. The keratin-filament cycle of assembly  
589 and disassembly. *Journal of cell science.* 2010;123(Pt 13):2266-72.
- 590 7. Robert A, Hookway C, Gelfand VI. Intermediate filament dynamics: What we can see now and  
591 why it matters. *Bioessays.* 2016;38(3):232-43.
- 592 8. Windoffer R, Woll S, Strnad P, Leube RE. Identification of novel principles of keratin filament  
593 network turnover in living cells. *Molecular biology of the cell.* 2004;15(5):2436-48.
- 594 9. Yoon KH, Yoon M, Moir RD, Khuon S, Flitney FW, Goldman RD. Insights into the dynamic  
595 properties of keratin intermediate filaments in living epithelial cells. *Journal of Cell Biology.*  
596 2001;153(3):503-16.
- 597 10. Haines RL, Lane EB. Keratins and disease at a glance. *J Cell Sci.* 2012;125(Pt 17):3923-8.
- 598 11. Jacob JT, Coulombe PA, Kwan R, Omary MB. Types I and II Keratin Intermediate Filaments.  
599 *Cold Spring Harbor perspectives in biology.* 2018;10(4).

- 600 12. Coulombe PA, Hutton ME, Letai A, Hebert A, Paller AS, Fuchs E. Point mutations in human  
601 keratin 14 genes of epidermolysis bullosa simplex patients: genetic and functional analyses. *Cell*.  
602 1991;66(6):1301-11.
- 603 13. Coulombe PA, Lee CH. Defining keratin protein function in skin epithelia: epidermolysis  
604 bullosa simplex and its aftermath. *J Invest Dermatol*. 2012;132(3 Pt 2):763-75.
- 605 14. Wilson AK, Coulombe PA, Fuchs E. The roles of K5 and K14 head, tail, and R/K L L E G E  
606 domains in keratin filament assembly in vitro. *The Journal of cell biology*. 1992;119(2):401-14.
- 607 15. Parry DA, Steinert PM. Intermediate filaments: molecular architecture, assembly, dynamics  
608 and polymorphism. *Q Rev Biophys*. 1999;32(2):99-187.
- 609 16. Chernyatina AA, Guzenko D, Strelkov SV. Intermediate filament structure: the bottom-up  
610 approach. *Current opinion in cell biology*. 2015;32:65-72.
- 611 17. Steinert PM, Marekov LN, Fraser RD, Parry DA. Keratin intermediate filament structure.  
612 Crosslinking studies yield quantitative information on molecular dimensions and mechanism of  
613 assembly. *Journal of molecular biology*. 1993;230(2):436-52.
- 614 18. Lee CH, Kim MS, Li S, Leahy DJ, Coulombe PA. Structure-Function Analyses of a Keratin  
615 Heterotypic Complex Identify Specific Keratin Regions Involved in Intermediate Filament Assembly.  
616 *Structure*. 2020;28(3):355-62 e4.
- 617 19. Herrmann H, Aebi U. Intermediate Filaments: Structure and Assembly. *Cold Spring Harbor*  
618 *perspectives in biology*. 2016;8(11).
- 619 20. Eldirany SA, Lomakin IB, Ho M, Bunick CG. Recent insight into intermediate filament  
620 structure. *Current opinion in cell biology*. 2020;68:132-43.
- 621 21. Lee CH, Kim MS, Chung BM, Leahy DJ, Coulombe PA. Structural basis for heteromeric  
622 assembly and perinuclear organization of keratin filaments. *Nat Struct Mol Biol*. 2012;19(7):707-+.
- 623 22. Bunick CG, Milstone LM. The X-Ray Crystal Structure of the Keratin 1-Keratin 10 Helix 2B  
624 Heterodimer Reveals Molecular Surface Properties and Biochemical Insights into Human Skin  
625 Disease. *J Invest Dermatol*. 2017;137(1):142-50.

- 626 23. Eldirany SA, Ho M, Hinbest AJ, Lomakin IB, Bunick CG. Human keratin 1/10-1B tetramer  
627 structures reveal a knob-pocket mechanism in intermediate filament assembly. *The EMBO journal*.  
628 2019;38(11).
- 629 24. Bray DJ, Walsh TR, Noro MG, Notman R. Complete Structure of an Epithelial Keratin Dimer:  
630 Implications for Intermediate Filament Assembly. *PLoS one*. 2015;10(7):e0132706.
- 631 25. Astbury WT. X-Ray Studies of the Structure of Compounds of Biological Interest. Annual  
632 review of biochemistry. 1939;8(1):113-33.
- 633 26. Crick FHC. Is Alpha-Keratin a Coiled Coil. *Nature*. 1952;170(4334):882-3.
- 634 27. Crick FHC. The Packing of Alpha-Helices - Simple Coiled-Coils. *Acta Crystallogr*. 1953;6(8-  
635 9):689-97.
- 636 28. Herrmann H, Haner M, Brettel M, Ku NO, Aebi U. Characterization of distinct early assembly  
637 units of different intermediate filament proteins. *Journal of molecular biology*. 1999;286(5):1403-20.
- 638 29. Engel A, Eichner R, Aebi U. Polymorphism of Reconstituted Human Epidermal Keratin  
639 Filaments - Determination of Their Mass-Per-Length and Width by Scanning-Transmission Electron-  
640 Microscopy (Stem). *J Ultra Mol Struct R*. 1985;90(3):323-35.
- 641 30. Bruce Fraser RD, Steinert PM, Parry DAD. Structural changes in trichocyte keratin  
642 intermediate filaments during keratinization. *Journal of structural biology*. 2003;142(2):266-71.
- 643 31. Parry DA. Hard alpha-keratin intermediate filaments: an alternative interpretation of the low-  
644 angle equatorial X-ray diffraction pattern, and the axial disposition of putative disulphide bonds in  
645 the intra- and inter-protofilamentous networks. *Int J Biol Macromol*. 1996;19(1):45-50.
- 646 32. Fraser RDB, Parry DAD. Intermediate filament structure in fully differentiated (oxidised)  
647 trichocyte keratin. *Journal of structural biology*. 2017;200(1):45-53.
- 648 33. Watts NR, Jones LN, Cheng NQ, Wall JS, Parry DAD, Steven AC. Cryo-electron microscopy of  
649 trichocyte (hard alpha-keratin) intermediate filaments reveals a low-density core. *Journal of*  
650 *structural biology*. 2002;137(1-2):109-18.

- 651 34. Herrmann H, Aebi U. Intermediate filaments: Molecular structure, assembly mechanism, and  
652 integration into functionally distinct intracellular scaffolds. *Annual review of biochemistry*.  
653 2004;73:749-89.
- 654 35. Weber MS, Wojtynek M, Medalia O. Cellular and Structural Studies of Eukaryotic Cells by  
655 Cryo-Electron Tomography. *Cells*. 2019;8(1).
- 656 36. Scheres SH. Processing of Structurally Heterogeneous Cryo-EM Data in RELION. *Methods*  
657 *Enzymol*. 2016;579:125-57.
- 658 37. Moll R, Divo M, Langbein L. The human keratins: biology and pathology. *Histochemistry and*  
659 *Cell Biology*. 2008;129(6):705-33.
- 660 38. Homberg M, Ramms L, Schwarz N, Dreissen G, Leube RE, Merkel R, et al. Distinct Impact of  
661 Two Keratin Mutations Causing Epidermolysis Bullosa Simplex on Keratinocyte Adhesion and  
662 Stiffness. *J Invest Dermatol*. 2015;135(10):2437-45.
- 663 39. Hu J, Li Y, Hao Y, Zheng T, Gupta SK, Parada GA, et al. High stretchability, strength, and  
664 toughness of living cells enabled by hyperelastic vimentin intermediate filaments. *Proceedings of the*  
665 *National Academy of Sciences of the United States of America*. 2019;116(35):17175-80.
- 666 40. Turgay Y, Eibauer M, Goldman AE, Shimi T, Khayat M, Ben-Harush K, et al. The molecular  
667 architecture of lamins in somatic cells. *Nature*. 2017;543(7644):261-4.
- 668 41. Kronenberg-Tenga R, Tatli M, Eibauer M, Wu W, Shin JY, Bonne G, et al. A lamin A/C variant  
669 causing striated muscle disease provides insights into filament organization. *Journal of cell science*.  
670 2021.
- 671 42. Svitkina TM, Borisy GG. Correlative light and electron microscopy of the cytoskeleton of  
672 cultured cells. *Methods Enzymol*. 1998;298:570-92.
- 673 43. Svitkina TM, Verkhovsky AB, Borisy GG. Improved procedures for electron microscopic  
674 visualization of the cytoskeleton of cultured cells. *Journal of structural biology*. 1995;115(3):290-303.
- 675 44. Sailer M, Hohn K, Luck S, Schmidt V, Beil M, Walther P. Novel electron tomographic methods  
676 to study the morphology of keratin filament networks. *Microsc Microanal*. 2010;16(4):462-71.

- 677 45. Tenga R, Medalia O. Structure and unique mechanical aspects of nuclear lamin filaments.  
678 *Curr Opin Struct Biol.* 2020;64:152-9.
- 679 46. Block J, Schroeder V, Pawelzyk P, Willenbacher N, Koster S. Physical properties of cytoplasmic  
680 intermediate filaments. *Biochim Biophys Acta.* 2015;1853(11 Pt B):3053-64.
- 681 47. Coulombe PA, Fuchs E. Elucidating the early stages of keratin filament assembly. *The Journal*  
682 *of cell biology.* 1990;111(1):153-69.
- 683 48. Herrmann H, Wedig T, Porter RM, Lane EB, Aebi U. Characterization of early assembly  
684 intermediates of recombinant human keratins. *Journal of structural biology.* 2002;137(1-2):82-96.
- 685 49. Koster S, Weitz DA, Goldman RD, Aebi U, Herrmann H. Intermediate filament mechanics in  
686 vitro and in the cell: from coiled coils to filaments, fibers and networks. *Current opinion in cell*  
687 *biology.* 2015;32:82-91.
- 688 50. Scheres SHW. RELION: Implementation of a Bayesian approach to cryo-EM structure  
689 determination. *Journal of structural biology.* 2012;180(3):519-30.
- 690 51. He SD, Scheres SHW. Helical reconstruction in RELION. *Journal of structural biology.*  
691 2017;198(3):163-76.
- 692 52. Diaz R, Rice WJ, Stokes DL. Fourier-Bessel reconstruction of helical assemblies. *Methods*  
693 *Enzymol.* 2010;482:131-65.
- 694 53. Martins B, Sorrentino S, Chung WL, Tatli M, Medalia O, Eibauer M. Unveiling the polarity of  
695 actin filaments by cryo-electron tomography. *Structure.* 2021.
- 696 54. Redmond CJ, Coulombe PA. Intermediate filaments as effectors of differentiation. *Curr Opin*  
697 *Cell Biol.* 2021;68:155-62.
- 698 55. Gordon BA. Neurofilaments in disease: what do we know? *Curr Opin Neurobiol.* 2020;61:105-  
699 15.
- 700 56. Danielsson F, Peterson MK, Caldeira Araujo H, Lautenschlager F, Gad AKB. Vimentin Diversity  
701 in Health and Disease. *Cells.* 2018;7(10).



- 702 57. Snider NT, Omary MB. Post-translational modifications of intermediate filament proteins:  
703 mechanisms and functions. *Nature reviews Molecular cell biology*. 2014;15(3):163-77.
- 704 58. Sigworth FJ. Principles of cryo-EM single-particle image processing. *Microscopy (Oxf)*.  
705 2016;65(1):57-67.
- 706 59. Quinlan RA, Cohlberg JA, Schiller DL, Hatzfeld M, Franke WW. Heterotypic tetramer (A2D2)  
707 complexes of non-epidermal keratins isolated from cytoskeletons of rat hepatocytes and hepatoma  
708 cells. *Journal of molecular biology*. 1984;178(2):365-88.
- 709 60. Gittes F, Mickey B, Nettleton J, Howard J. Flexural rigidity of microtubules and actin filaments  
710 measured from thermal fluctuations in shape. *The Journal of cell biology*. 1993;120(4):923-34.
- 711 61. Sapra KT, Qin Z, Dubrovsky-Gaupp A, Aebi U, Muller DJ, Buehler MJ, et al. Nonlinear  
712 mechanics of lamin filaments and the meshwork topology build an emergent nuclear lamina. *Nature*  
713 *communications*. 2020;11(1):6205.
- 714 62. Lichtenstern T, Mucke N, Aebi U, Mauermann M, Herrmann H. Complex formation and  
715 kinetics of filament assembly exhibited by the simple epithelial keratins K8 and K18. *Journal of*  
716 *structural biology*. 2012;177(1):54-62.
- 717 63. Pawelzyk P, Mucke N, Herrmann H, Willenbacher N. Attractive Interactions among  
718 Intermediate Filaments Determine Network Mechanics In Vitro. *PloS one*. 2014;9(4).
- 719 64. Rogers GE. Structural and biochemical features of the hair follicle. Academic Press. 1964(*The*  
720 *Epidermis*):179–236.
- 721 65. Kadir M, Wang XW, Zhu BW, Liu J, Harland D, Popescu C. The structure of the "amorphous"  
722 matrix of keratins. *Journal of structural biology*. 2017;198(2):116-23.
- 723 66. Steven AC, Hainfeld JF, Trus BL, Wall JS, Steinert PM. The distribution of mass in  
724 heteropolymer intermediate filaments assembled in vitro. Stem analysis of vimentin/desmin and  
725 bovine epidermal keratin. *The Journal of biological chemistry*. 1983;258(13):8323-9.
- 726 67. Colakoglu G, Brown A. Intermediate filaments exchange subunits along their length and  
727 elongate by end-to-end annealing. *Journal of Cell Biology*. 2009;185(5):769-77.

- 728 68. Ngai J, Coleman TR, Lazarides E. Localization of newly synthesized vimentin subunits reveals a  
729 novel mechanism of intermediate filament assembly. *Cell*. 1990;60(3):415-27.
- 730 69. Miller RK, Vikstrom K, Goldman RD. Keratin Incorporation into Intermediate Filament  
731 Networks Is a Rapid Process. *Journal of Cell Biology*. 1991;113(4):843-55.
- 732 70. Vikstrom KL, Borisy GG, Goldman RD. Dynamic aspects of intermediate filament networks in  
733 BHK-21 cells. *Proceedings of the National Academy of Sciences of the United States of America*.  
734 1989;86(2):549-53.
- 735 71. Kreplak L, Bar H, Leterrier JF, Herrmann H, Aebi U. Exploring the mechanical behavior of  
736 single intermediate filaments. *Journal of molecular biology*. 2005;354(3):569-77.
- 737 72. Fudge DS, Gardner KH, Forsyth VT, Riekel C, Gosline JM. The mechanical properties of  
738 hydrated intermediate filaments: insights from hagfish slime threads. *Biophys J*. 2003;85(3):2015-27.
- 739 73. Pinto N, Yang FC, Negishi A, Rheinstadter MC, Gillis TE, Fudge DS. Self-assembly enhances the  
740 strength of fibers made from vimentin intermediate filament proteins. *Biomacromolecules*.  
741 2014;15(2):574-81.
- 742 74. Mastrorarde DN. Automated electron microscope tomography using robust prediction of  
743 specimen movements. *Journal of structural biology*. 2005;152(1):36-51.
- 744 75. Reisner W, Pedersen JN, Austin RH. DNA confinement in nanochannels: physics and biological  
745 applications. *Rep Prog Phys*. 2012;75(10):106601.
- 746 76. Zivanov J, Nakane T, Forsberg BO, Kimanius D, Hagen WJH, Lindahl E, et al. New tools for  
747 automated high-resolution cryo-EM structure determination in RELION-3. *Elife*. 2018;7.
- 748 77. Zheng SQ, Palovcak E, Armache JP, Verba KA, Cheng YF, Agard DA. MotionCor2: anisotropic  
749 correction of beam-induced motion for improved cryo-electron microscopy. *Nature methods*.  
750 2017;14(4):331-2.
- 751 78. Rohou A, Grigorieff N. CTFFIND4: Fast and accurate defocus estimation from electron  
752 micrographs. *Journal of structural biology*. 2015;192(2):216-21.

- 753 79. Rosenthal PB, Henderson R. Optimal determination of particle orientation, absolute hand,  
754 and contrast loss in single-particle electron cryomicroscopy. *Journal of molecular biology*.  
755 2003;333(4):721-45.
- 756 80. Kremer JR, Mastronarde DN, McIntosh JR. Computer visualization of three-dimensional  
757 image data using IMOD. *Journal of Structural Biology*. 1996;116(1):71-6.
- 758 81. Steinert PM, Steven AC, Roop DR. The molecular biology of intermediate filaments. *Cell*.  
759 1985;42(2):411-20.
- 760 82. Kocsis E, Trus BL, Steer CJ, Bisher ME, Steven AC. Image averaging of flexible fibrous  
761 macromolecules: the clathrin triskelion has an elastic proximal segment. *Journal of structural biology*.  
762 1991;107(1):6-14.
- 763 83. Pettersen EF, Goddard TD, Huang CC, Couch GS, Greenblatt DM, Meng EC, et al. UCSF  
764 Chimera--a visualization system for exploratory research and analysis. *J Comput Chem*.  
765 2004;25(13):1605-12.
- 766
